# Supplementary material for: Structural Basis for the Inhibition of Coronaviral Main Proteases by a Benzothiazole-Based Inhibitor
Source: MDPI journal article supplement (doi:10.3390/v14092075), 2022-09-18
Supplement: s1 [file s1]

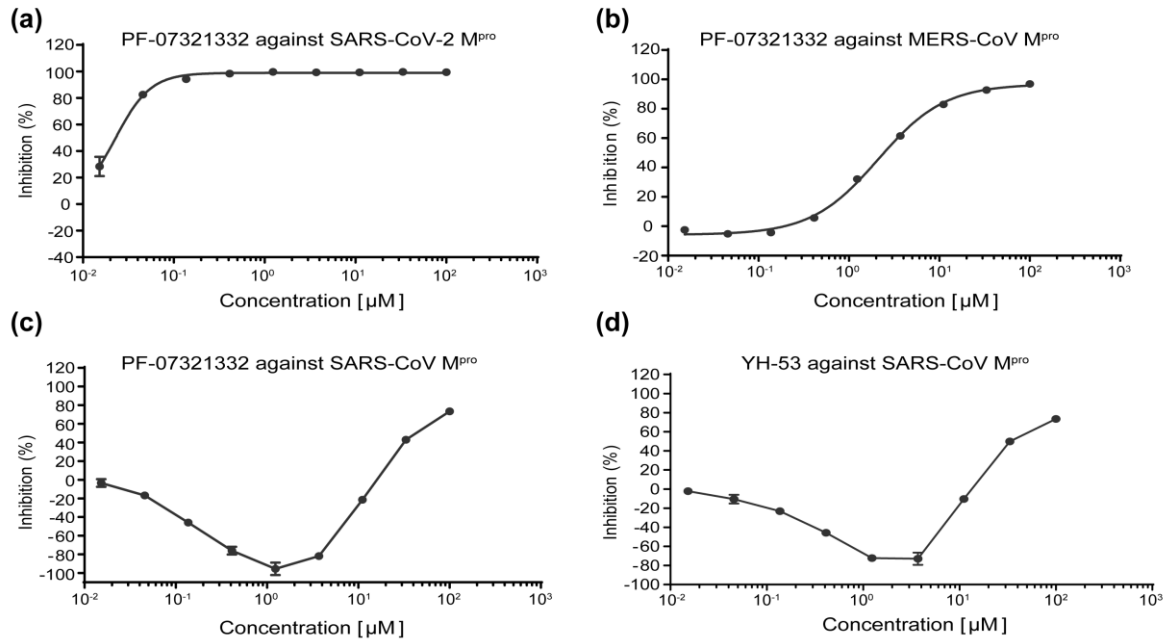

**Figure S1.** Enzymatic inhibition activities of YH-53 and PF-07321332. (a) Inhibition of PF-07321332 against main protease of SARS-CoV-2. (b) Inhibition of PF-07321332 against main protease of MERS-CoV. (c) Inhibition of PF-07321332 against main protease of SARS-CoV. (d) Inhibition of YH-53 against main protease of SARS-CoV. Main proteases were preincubated in the reaction buffer with various concentrations of YH-53 or PF-07321332 at room temperature for 30 minutes before reacting with the FRET substrate.

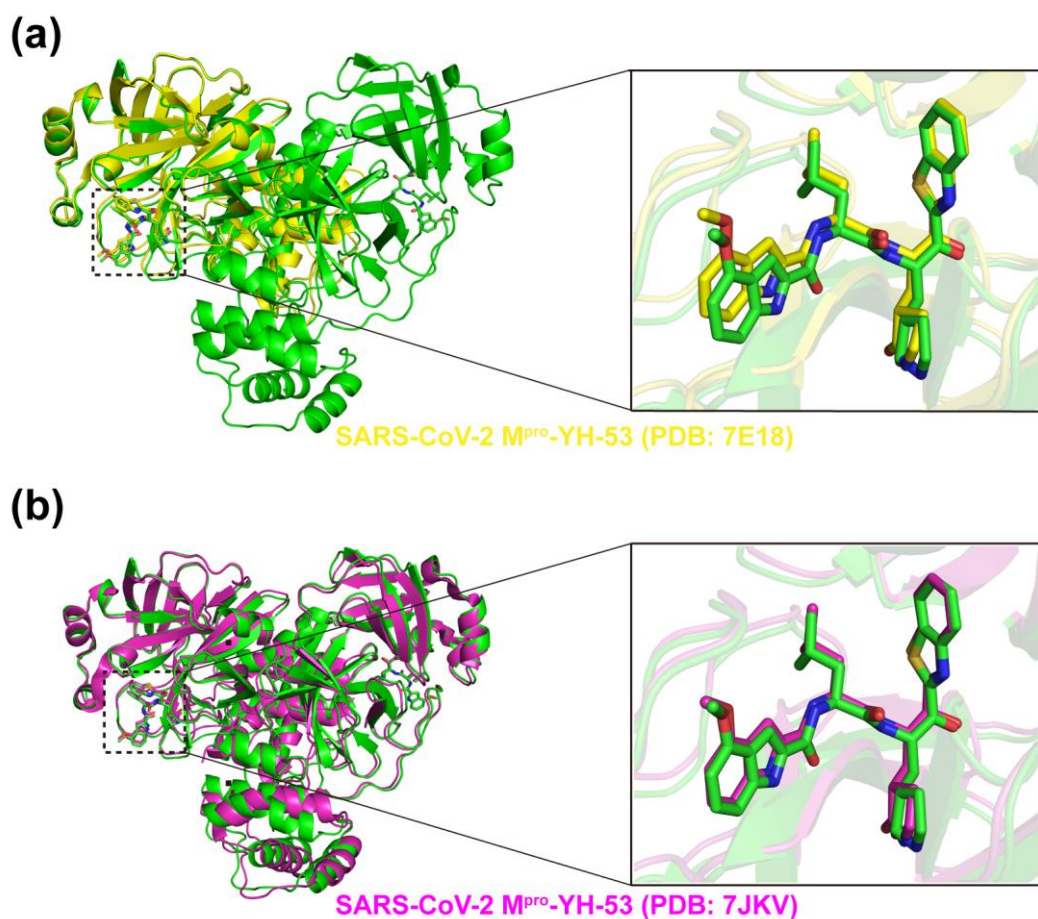

**Figure S2.** Comparison of the SARS-CoV-2 M<sup>pro</sup>-YH-53 structure we reported in this study to SARS-CoV-2 M<sup>pro</sup>-YH-53 structures reported previously. **(a)** Comparison of our structure (green) to the SARS-CoV-2 M<sup>pro</sup>-YH53 structure (PDB ID 7E18, yellow). **(b)** Comparison of our structure (green) to the SARS-CoV-2 M<sup>pro</sup>-YH53 structure (PDB ID 7JKV, magentas).

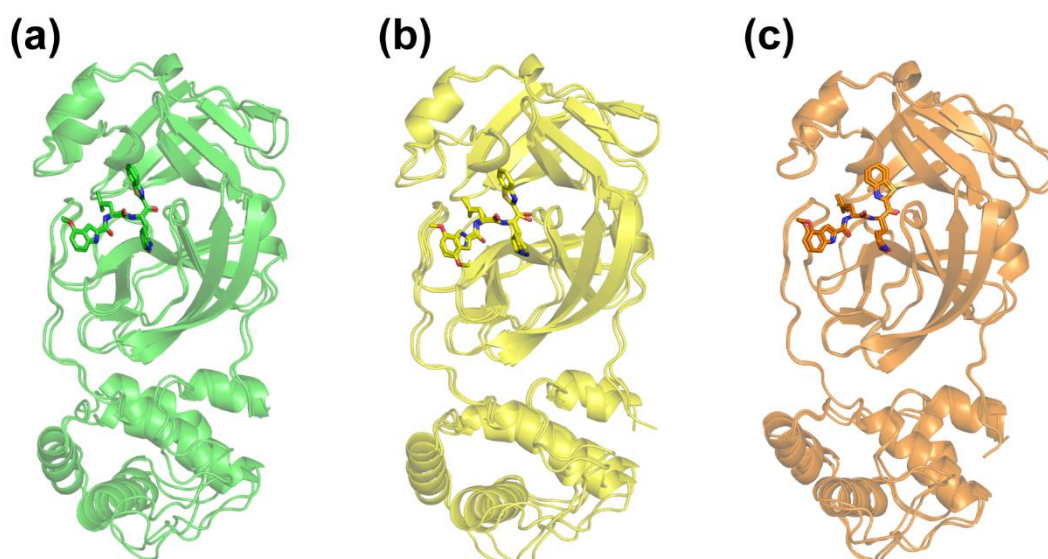

**Figure S3.** Structural comparison of protomer A and B of SARS-CoV-2, SARS-CoV and MERS-CoV M<sup>pro</sup>s bound to YH-53. Structural comparison of protomer A and protomer B of SARS-CoV-2 M<sup>pro</sup> (a), SARS-CoV M<sup>pro</sup> (b) and MERS-CoV M<sup>pro</sup> (c) bound to YH-53. Protomers are shown as cartoons, while ligands are shown as sticks.

|                            |           |           |             |          |          |             |                 |
|----------------------------|-----------|-----------|-------------|----------|----------|-------------|-----------------|
| SARS-CoV-2                 | 1         | 10        | 20          | 30       | 40       | 50          | 60              |
| SARS-CoV-2 Alpha variant   | SGFRKMAF  | PSGKVEG   | CMVQVT      | CGTTTLNG | LWLDV    | VYCPRHVICT  | SEDMLNPNYEDLLIR |
| SARS-CoV-2 Gamma variant   | SGFRKMAF  | PSGKVEG   | CMVQVT      | CGTTTLNG | LWLDV    | VYCPRHVICT  | SEDMLNPNYEDLLIR |
| SARS-CoV-2 Delta variant   | SGFRKMAF  | PSGKVEG   | CMVQVT      | CGTTTLNG | LWLDV    | VYCPRHVICT  | SEDMLNPNYEDLLIR |
| SARS-CoV-2 Beta variant    | SGFRKMAF  | PSGKVEG   | CMVQVT      | CGTTTLNG | LWLDV    | VYCPRHVICT  | SEDMLNPNYEDLLIR |
| SARS-CoV-2 Omicron variant | SGFRKMAF  | PSGKVEG   | CMVQVT      | CGTTTLNG | LWLDV    | VYCPRHVICT  | SEDMLNPNYEDLLIR |
| SARS-CoV-2 Lambda variant  | SGFRKMAF  | PSGKVEG   | CMVQVT      | CGTTTLNG | LWLDV    | VYCPRHVICT  | SEDMLNPNYEDLLIR |
| SARS-CoV                   | SGFRKMAF  | PSGKVEG   | CMVQVT      | CGTTTLNG | LWLDV    | VYCPRHVICT  | SEDMLNPNYEDLLIR |
| HCoV-HKU1                  | SGILVKMVS | PTSKIEP   | CVSVTV      | YGSMTLNG | LWLDV    | KVYCPRHVICT | SSNMNEPDYSALLCR |
| HCoV-OC43                  | SGILVKMVS | PTSKIEP   | CVSVTV      | YGSMTLNG | LWLDV    | KVYCPRHVICT | SSNMNEPDYSALLCR |
| MERS-CoV                   | SGILVKMVS | PTSKIEP   | CVSVTV      | YGSMTLNG | LWLDV    | KVYCPRHVICT | SSNMNEPDYSALLCR |
| HCoV-229E                  | AGLRKMAQ  | PSGKVEG   | CMVQVT      | CGTTTLNG | LWLDV    | VYCPRHVICT  | SEDMLNPNYEDLLIR |
| HCoV-NL63                  | SGFRKMAF  | PSGKVEG   | CMVQVT      | CGTTTLNG | LWLDV    | VYCPRHVICT  | SEDMLNPNYEDLLIR |
| SARS-CoV-2                 | 70        | 80        | 90          | 100      | 110      |             |                 |
| SARS-CoV-2 Alpha variant   | KSNHNF    | LVQAGN    | ...VQLRVIGH | SMQNCVLK | KLKVD    | TANPKTPKYK  | FVRIQPGQTF      |
| SARS-CoV-2 Gamma variant   | KSNHNF    | LVQAGN    | ...VQLRVIGH | SMQNCVLK | KLKVD    | TANPKTPKYK  | FVRIQPGQTF      |
| SARS-CoV-2 Delta variant   | KSNHNF    | LVQAGN    | ...VQLRVIGH | SMQNCVLK | KLKVD    | TANPKTPKYK  | FVRIQPGQTF      |
| SARS-CoV-2 Beta variant    | KSNHNF    | LVQAGN    | ...VQLRVIGH | SMQNCVLK | KLKVD    | TANPKTPKYK  | FVRIQPGQTF      |
| SARS-CoV-2 Omicron variant | KSNHNF    | LVQAGN    | ...VQLRVIGH | SMQNCVLK | KLKVD    | TANPKTPKYK  | FVRIQPGQTF      |
| SARS-CoV-2 Lambda variant  | KSNHNF    | LVQAGN    | ...VQLRVIGH | SMQNCVLK | KLKVD    | TANPKTPKYK  | FVRIQPGQTF      |
| SARS-CoV                   | KSNHNF    | LVQAGN    | ...VQLRVIGH | SMQNCVLK | KLKVD    | TANPKTPKYK  | FVRIQPGQTF      |
| HCoV-HKU1                  | VTLDG     | FTIMSGR   | ...MSLTIVSY | QMOGCOLV | TVSLQNP  | YTPKYK      | FGVVKPGET       |
| HCoV-OC43                  | VTSSD     | FTVLFDR   | ...LSLTIVSY | QMOGCOLV | TVSLQNP  | YTPKYK      | FGVVKPGET       |
| MERS-CoV                   | MTNHS     | FVQKHIGAP | ANLRVIGH    | SMQNCVLK | KLKVD    | TANPKTPKYK  | FVRIQPGQTF      |
| HCoV-229E                  | MRLHNF    | SIISGT    | ...AFILGVVG | ATMHGVT  | LKIKVS   | QSNVHTPK    | KHVFKTLKPGD     |
| HCoV-NL63                  | MRLHNF    | SIISGT    | ...AFILGVVG | ATMHGVT  | LKIKVS   | QSNVHTPK    | KHVFKTLKPGD     |
| SARS-CoV-2                 | 120       | 130       | 140         | 150      | 160      | 170         |                 |
| SARS-CoV-2 Alpha variant   | YNGSP     | SGVYQCA   | MRPNFTIK    | GSFLNGS  | CGSVGFNI | DY          | DCVSTFCYMH      |
| SARS-CoV-2 Gamma variant   | YNGSP     | SGVYQCA   | MRPNFTIK    | GSFLNGS  | CGSVGFNI | DY          | DCVSTFCYMH      |
| SARS-CoV-2 Delta variant   | YNGSP     | SGVYQCA   | MRPNFTIK    | GSFLNGS  | CGSVGFNI | DY          | DCVSTFCYMH      |
| SARS-CoV-2 Beta variant    | YNGSP     | SGVYQCA   | MRPNFTIK    | GSFLNGS  | CGSVGFNI | DY          | DCVSTFCYMH      |
| SARS-CoV-2 Omicron variant | YNGSP     | SGVYQCA   | MRPNFTIK    | GSFLNGS  | CGSVGFNI | DY          | DCVSTFCYMH      |
| SARS-CoV-2 Lambda variant  | YNGSP     | SGVYQCA   | MRPNFTIK    | GSFLNGS  | CGSVGFNI | DY          | DCVSTFCYMH      |
| SARS-CoV                   | YNGSP     | SGVYQCA   | MRPNFTIK    | GSFLNGS  | CGSVGFNI | DY          | DCVSTFCYMH      |
| HCoV-HKU1                  | YNGRP     | QGAHVT    | MRSSYTI     | KGSFLNGS | CGSVGFNI | DY          | DCVSTFCYMH      |
| HCoV-OC43                  | YNGRP     | QGAHVT    | MRSSYTI     | KGSFLNGS | CGSVGFNI | DY          | DCVSTFCYMH      |
| MERS-CoV                   | YNGRP     | QGAHVT    | MRSSYTI     | KGSFLNGS | CGSVGFNI | DY          | DCVSTFCYMH      |
| HCoV-229E                  | YDCA      | QGVFGVN   | MRTNWT      | IRGSFING | ACGSB    | GYNLKN      | GEVEFVYMH       |
| HCoV-NL63                  | YDCA      | QGVFGVN   | MRTNWT      | IRGSFING | ACGSB    | GYNLKN      | GEVEFVYMH       |
| SARS-CoV-2                 | 180       | 190       | 200         | 210      | 220      | 230         |                 |
| SARS-CoV-2 Alpha variant   | LEGNF     | YGPFFV    | DRQTAQA     | AGTDTT   | ITVNV    | LAWLYAAV    | INGDRWFLN       |
| SARS-CoV-2 Gamma variant   | LEGNF     | YGPFFV    | DRQTAQA     | AGTDTT   | ITVNV    | LAWLYAAV    | INGDRWFLN       |
| SARS-CoV-2 Delta variant   | LEGNF     | YGPFFV    | DRQTAQA     | AGTDTT   | ITVNV    | LAWLYAAV    | INGDRWFLN       |
| SARS-CoV-2 Beta variant    | LEGNF     | YGPFFV    | DRQTAQA     | AGTDTT   | ITVNV    | LAWLYAAV    | INGDRWFLN       |
| SARS-CoV-2 Omicron variant | LEGNF     | YGPFFV    | DRQTAQA     | AGTDTT   | ITVNV    | LAWLYAAV    | INGDRWFLN       |
| SARS-CoV-2 Lambda variant  | LEGNF     | YGPFFV    | DRQTAQA     | AGTDTT   | ITVNV    | LAWLYAAV    | INGDRWFLN       |
| SARS-CoV                   | LEGNF     | YGPFFV    | DRQTAQA     | AGTDTT   | ITVNV    | LAWLYAAV    | INGDRWFLN       |
| HCoV-HKU1                  | FTGNF     | YGPYRDA   | QVQVLP      | VKDYQ    | TVNV     | LAWLYAAV    | INGDRWFLN       |
| HCoV-OC43                  | FNGDF     | YGPYKDA   | QVQVLP      | IQDYI    | QSVNF    | LAWLYAAV    | INGDRWFLN       |
| MERS-CoV                   | FDGTM     | YGA       | FMDKQV      | HQVQL    | TDKY     | CSNV        | VAVLYAAV        |
| HCoV-229E                  | FDGVM     | YGFED     | QPNLO       | VESAN    | LM       | LSDNV       | VAVLYAAV        |
| HCoV-NL63                  | FTGSV     | YGNF      | DOP         | SLQV     | ESAN     | LM          | LSDNV           |
| SARS-CoV-2                 | 240       | 250       | 260         | 270      | 280      | 290         |                 |
| SARS-CoV-2 Alpha variant   | YNYEP     | LTQDH     | VDI         | LGPLSA   | QTGIA    | VLD         | MCA             |
| SARS-CoV-2 Gamma variant   | YNYEP     | LTQDH     | VDI         | LGPLSA   | QTGIA    | VLD         | MCA             |
| SARS-CoV-2 Delta variant   | YNYEP     | LTQDH     | VDI         | LGPLSA   | QTGIA    | VLD         | MCA             |
| SARS-CoV-2 Beta variant    | YNYEP     | LTQDH     | VDI         | LGPLSA   | QTGIA    | VLD         | MCA             |
| SARS-CoV-2 Omicron variant | YNYEP     | LTQDH     | VDI         | LGPLSA   | QTGIA    | VLD         | MCA             |
| SARS-CoV-2 Lambda variant  | YNYEP     | LTQDH     | VDI         | LGPLSA   | QTGIA    | VLD         | MCA             |
| SARS-CoV                   | YNYEP     | LTQDH     | VDI         | LGPLSA   | QTGIA    | VLD         | MCA             |
| HCoV-HKU1                  | NGFSQ     | VKADLV    | ..          | LDALAS   | MTGVS    | IETLLAA     | IKR             |
| HCoV-OC43                  | NGFSQ     | VKADLV    | ..          | LDALAS   | MTGVS    | IETLLAA     | IKR             |
| MERS-CoV                   | NQFTE     | FVGTQS    | ..          | VDM      | LAVK     | TGVA        | IEQLLYAI        |
| HCoV-229E                  | NGFTAM    | NGEDA     | ..          | FSI      | LAAK     | TGV         | VERLLHAI        |
| HCoV-NL63                  | NGYTS     | VSSVE     | ..          | YSI      | LAAK     | TGV         | VERLLHAI        |
| SARS-CoV-2                 | 300       |           |             |          |          |             |                 |
| SARS-CoV-2 Alpha variant   | VRQCS     | GVT       | FQ          |          |          |             |                 |
| SARS-CoV-2 Gamma variant   | VRQCS     | GVT       | FQ          |          |          |             |                 |
| SARS-CoV-2 Delta variant   | VRQCS     | GVT       | FQ          |          |          |             |                 |
| SARS-CoV-2 Beta variant    | VRQCS     | GVT       | FQ          |          |          |             |                 |
| SARS-CoV-2 Omicron variant | VRQCS     | GVT       | FQ          |          |          |             |                 |
| SARS-CoV-2 Lambda variant  | VRQCS     | GVT       | FQ          |          |          |             |                 |
| SARS-CoV                   | VRQCS     | GVT       | FQ          |          |          |             |                 |
| HCoV-HKU1                  | YQQLAG    | VKL       | Q           |          |          |             |                 |
| HCoV-OC43                  | YQQLAG    | VKL       | Q           |          |          |             |                 |
| MERS-CoV                   | NMIM      | GVM       | Q           |          |          |             |                 |
| HCoV-229E                  | VKMF      | GVL       | Q           |          |          |             |                 |
| HCoV-NL63                  | VKMF      | GVL       | Q           |          |          |             |                 |

**Figure S4.** Sequence alignment of M<sup>pro</sup>s from different coronaviruses. The M<sup>pro</sup> amino acid sequences of SARS-CoV-2, SARS-CoV, MERS-CoV, HCoV-NL63, HCoV-229E, HCoV-HKU1, HCoV-OC43, SARS-CoV-2 Alpha variant, SARS-CoV-2 Beta variant, SARS-CoV-2 Gamma variant, SARS-CoV-2 Delta variant, SARS-CoV-2 Lambda variant, and SARS-CoV-2 Omicron variant were retrieved from Genbank or GISAID. ClustalX (1.83) software was used for sequence alignment and ESPrpt 3.0 was used to generate a graphical representation. The key residues involved in interacting with inhibitors were labeled with blue dashed boxes.
